# Supplementary material for: Catalytic upgrading of carboxylic acids as bio-oil models over hierarchical ZSM-5 obtained via an organosilane approach
Source: Royal Society of Chemistry journal article supplement (doi:10.1039/c7ra03890a), 2017-01-01
Supplement: c7ra03890a1.pdf [file c7ra03890a1.pdf]

## Supplementary Information

### **Catalytic upgrading of carboxylic acid as bio-oil models over hierarchical ZSM-5 obtained via an organosilane approach**

Kamonlatth Rodponthukwaji,<sup>a</sup> Chularat Wattanakit,<sup>\*b</sup> Thittaya Yutthalekha,<sup>b</sup> Sunpet Assavapanumat,<sup>b</sup> Chompunuch Warakulwit,<sup>a</sup> Wannaruedee Wannapakdee<sup>b</sup> and Jumras Limtrakul<sup>c</sup>

<sup>a</sup> Department of Chemistry and NANOTEC Center for Nanoscale Materials Design for Green Nanotechnology, Kasetsart University, Bangkok 10900, Thailand

<sup>b</sup> Department of Chemical and Biomolecular Engineering, School of Energy Science and Engineering, Vidyasirimedhi Institution of Science and Technology, Rayong 21210, Thailand

<sup>c</sup> Department of Materials Science and Engineering, School of Molecular Science and Engineering, Vidyasirimedhi Institution of Science and Technology, Rayong 21210, Thailand

\* Corresponding author; e-mail [chularat.w@vistec.ac.th](mailto:chularat.w@vistec.ac.th)

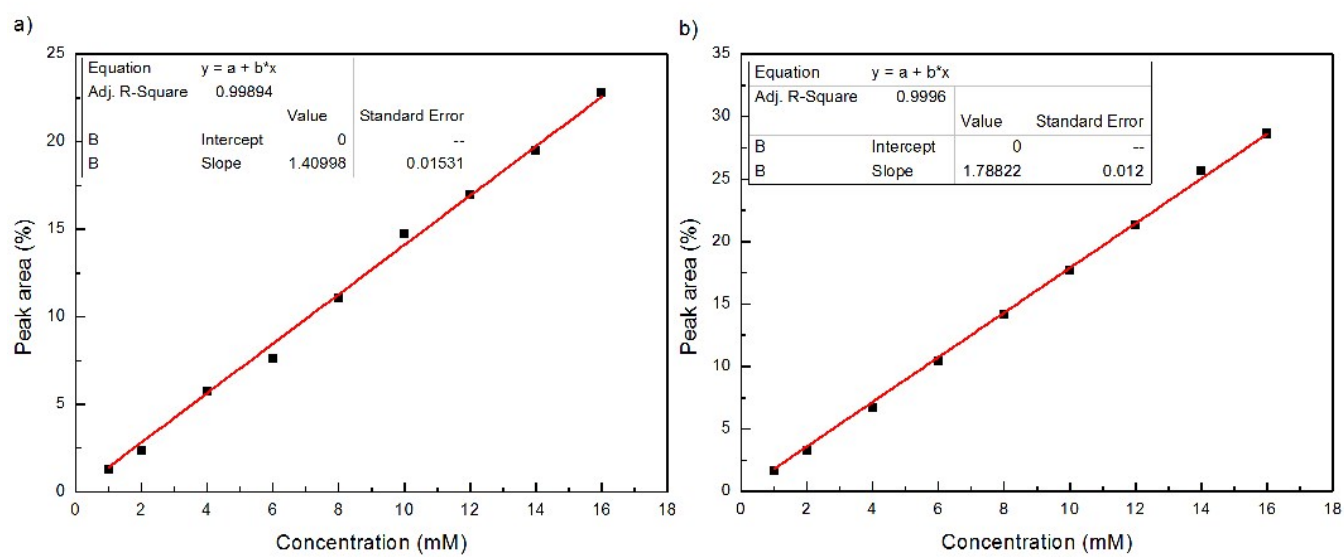

**Figure S1.** Calibration curves of a) Benzyl alcohol and b) Benzyl acetate by using decane as an internal standard.

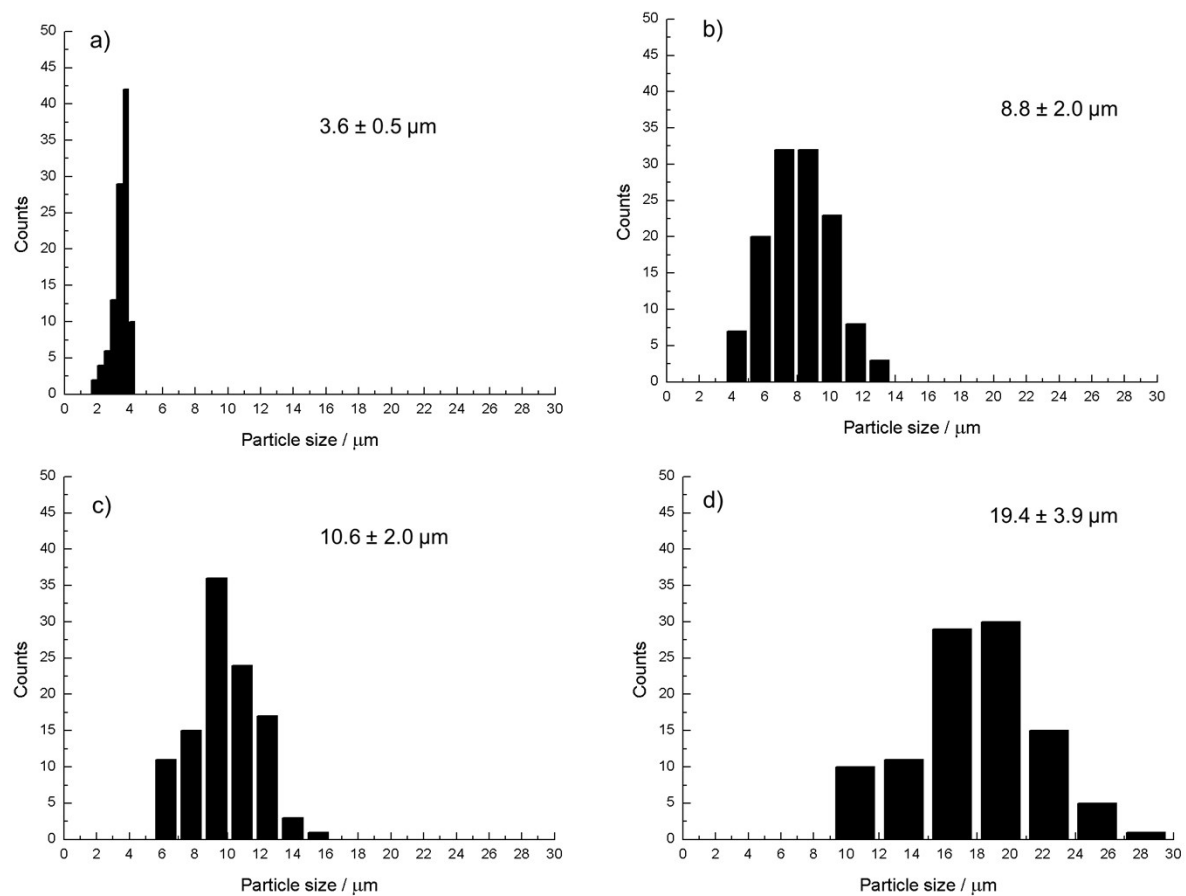

**Figure S2.** Particle size distribution of (a) C\_ZSM-5, (b) ZSM-5\_(4.8)TPOAC, (c) ZSM-5\_(9.6)TPOAC, and (d) ZSM-5\_(38.4)TPOAC.

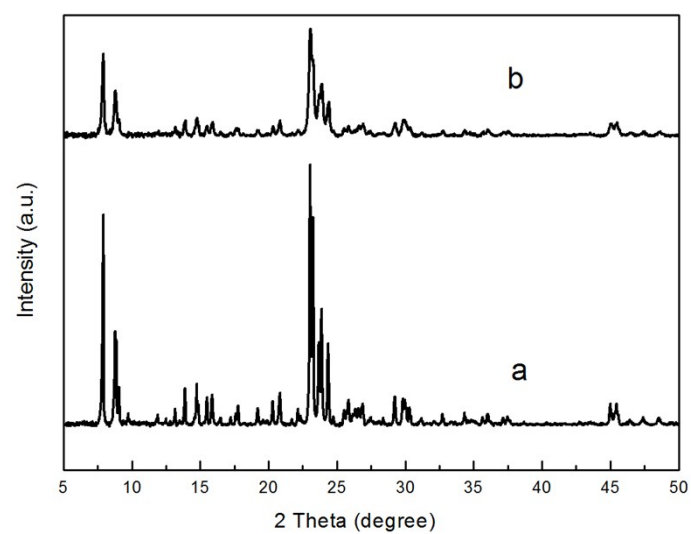

**Figure S3.** XRD patterns of samples with low Si/Al ratio: (a) Commercial ZSM-5, and (b) Hierarchical ZSM-5(34).

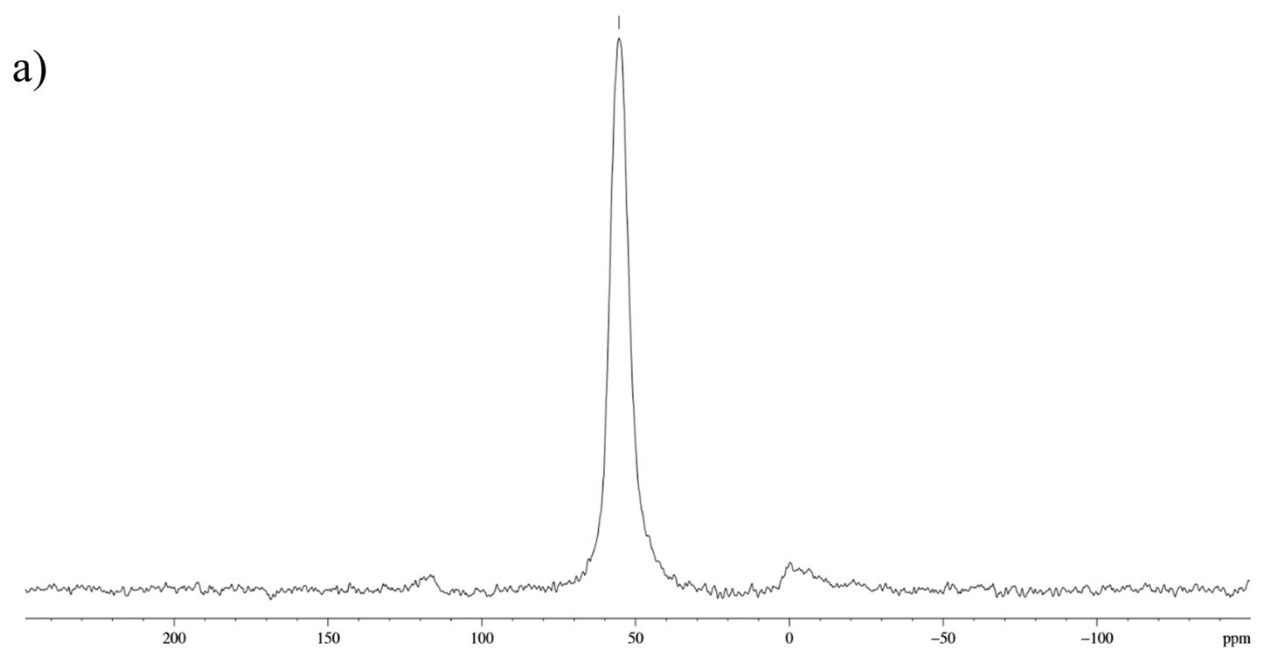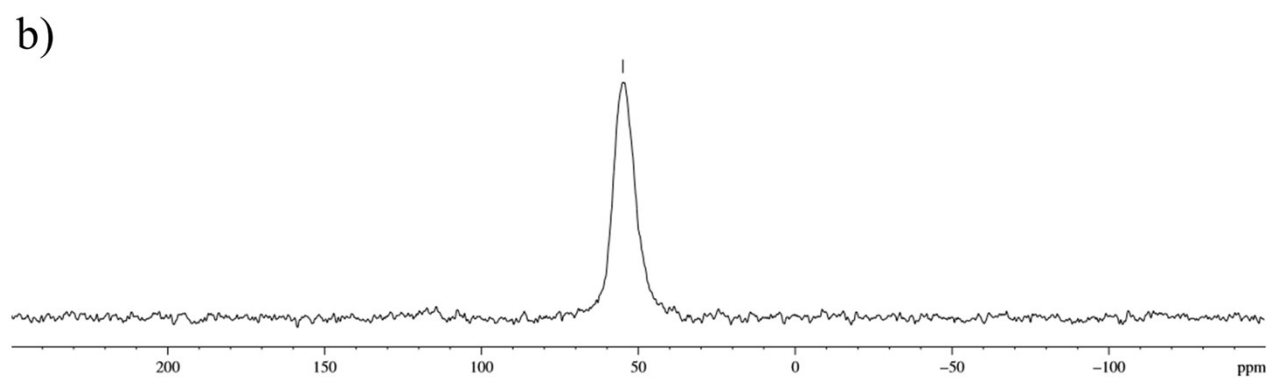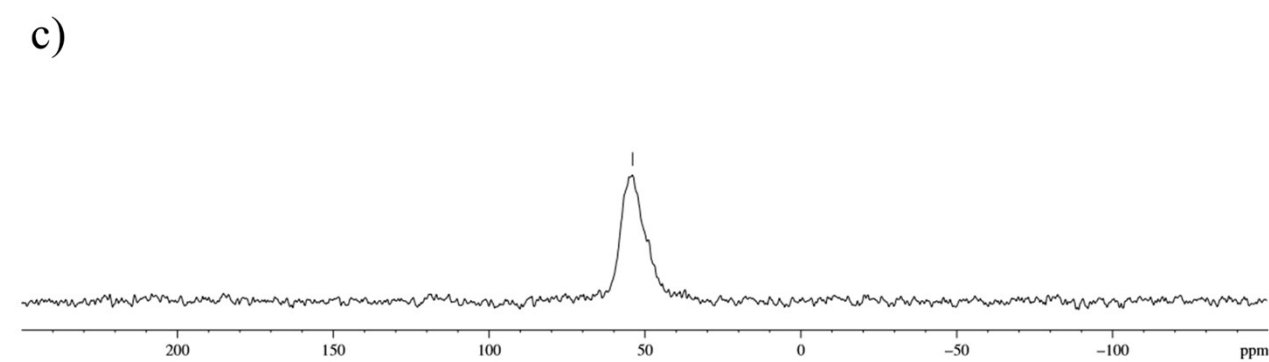

**Figure S4.**  $^{27}\text{Al}$  MAS NMR spectra of (a) Commercial ZSM-5, (b) Hierarchical ZSM-5(34), and (c) Hierarchical ZSM-5(90).

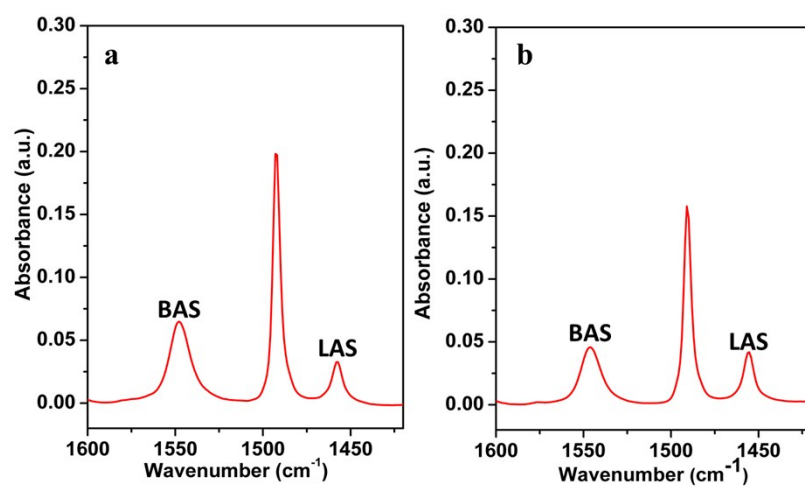

**Figure S5.** FTIR spectra of pyridine adsorbed on a) Commercial ZSM-5 and b) Hierarchical ZSM-5(34), after evacuation at 573 K.

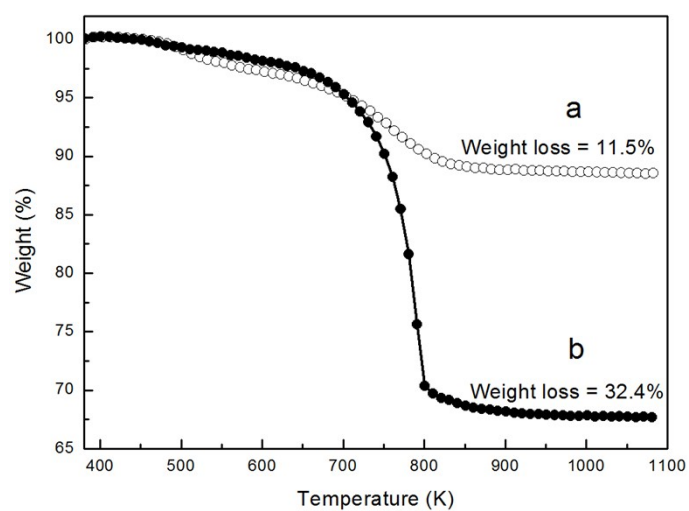

**Figure S6.** Weight loss profiles of a) Hierarchical ZSM-5(34), and b) Commercial ZSM-5 catalysts.

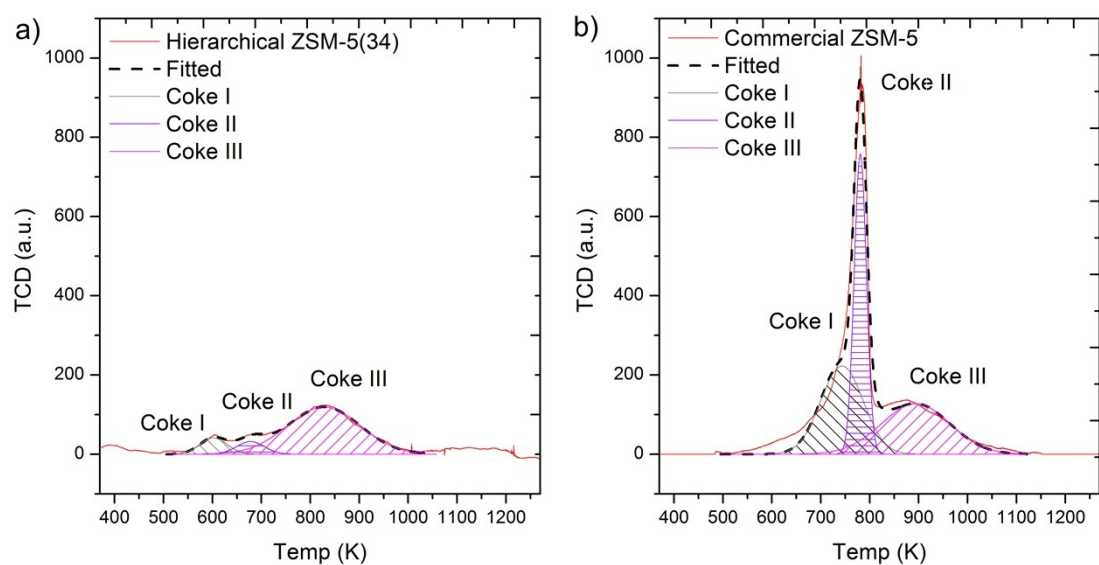

**Figure S7.** O<sub>2</sub> TPO profiles of a) Hierarchical ZSM-5(34), and b) Commercial ZSM-5 catalysts.

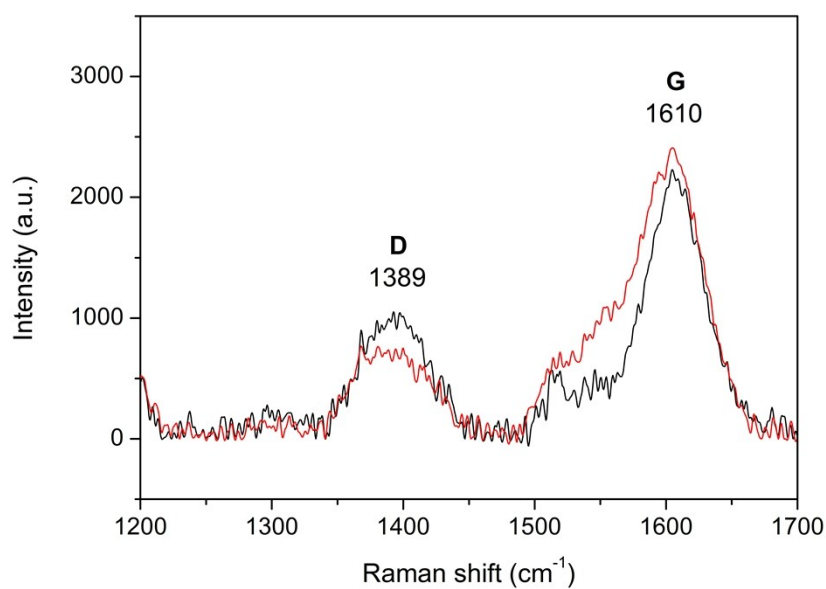

**Figure S8.** Raman spectra at 532 nm of spent catalysts: Commercial ZSM-5 (black) and Hierarchical ZSM-5(34) (red).

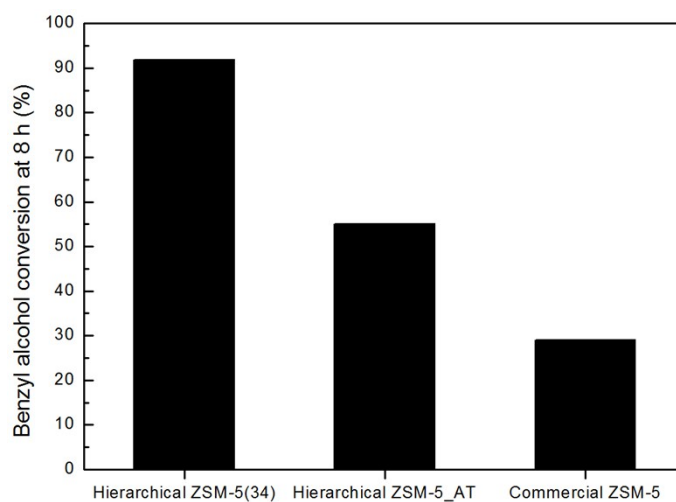

**Figure S9.** Benzyl alcohol conversion (%) on different samples obtained by different methods: Hierarchical ZSM-5(34), Commercial ZSM-5, and Hierarchical ZSM-5\_AT.

**Table S1.** Relative crystallinity (%) of all synthesized ZSM-5 samples

| Samples           | % Crystallinity |
|-------------------|-----------------|
| C_ZSM-5           | 95.0            |
| ZSM-5_(4.8)TPOAC  | 58.4            |
| ZSM-5_(9.6)TPOAC  | 66.0            |
| ZSM-5_(38.4)TPOAC | 40.0            |

**Table S2.** Brønsted and Lewis acidity of Commercial HZSM-5 and Hierarchical ZSM-5(34), after evacuation at 573 K.

| Sample                 | [BAS]<br>( $\mu\text{mol/g}$ ) | [LAS]<br>( $\mu\text{mol/g}$ ) |
|------------------------|--------------------------------|--------------------------------|
|                        | 573 K                          | 573 K                          |
| Commercial HZSM-5      | 109                            | 18                             |
| Hierarchical ZSM-5(34) | 82                             | 31                             |



**Table S3.** Textural properties of hierarchical zeolites obtained from direct- and post synthesis approaches.

| Samples                | $S_{\text{BET}}^a$ | $S_{\text{micro}}^b$ | $S_{\text{ext}}^c$ | $V_{\text{total}}^d$ | $V_{\text{micro}}^e$ | $V_{\text{ext/meso}}^f$ | $V_{\text{Meso}}/V_{\text{total}}^g$ |
|------------------------|--------------------|----------------------|--------------------|----------------------|----------------------|-------------------------|--------------------------------------|
| Hierarchical ZSM-5(34) | 434                | 287                  | 147                | 0.3378               | 0.1151               | 0.2227                  | 0.66                                 |
| Hierarchical ZSM-5_AT  | 349                | 186                  | 164                | 0.4562               | 0.0755               | 0.3807                  | 0.83                                 |

<sup>a</sup> $S_{\text{BET}}$ : BET specific surface area; <sup>b</sup> $S_{\text{micro}}$ : micropore surface area; <sup>c</sup> $S_{\text{ext}}$ : external surface area; <sup>d</sup> $V_{\text{total}}$ : total pore volume; <sup>e</sup> $V_{\text{micro}}$ : micropore volume; <sup>f</sup> $V_{\text{micro}} = V_{\text{total}} - V_{\text{ext/meso}}$ ; All surface areas and pore volumes are in the units of  $\text{m}^2/\text{g}$  and  $\text{cm}^3/\text{g}$ , respectively. <sup>g</sup>Fraction of mesopore volume.

**Table S4.** Catalytic activity of commercial ZSM-5 and hierarchical ZSM-5(34) for the esterification of levulinic acid with ethanol.

| Catalyst               | Time (h) | Conversion of Levulinic acid (%) | Selectivity of Ethyl levulinate (%) |
|------------------------|----------|----------------------------------|-------------------------------------|
| Commercial ZSM-5       | 3        | 7.43                             | 89.13                               |
|                        | 6        | 18.72                            | 100.00                              |
|                        | 24       | 25.20                            | 100.00                              |
|                        | 48       | 28.66                            | 100.00                              |
| Hierarchical ZSM-5(34) | 3        | 31.09                            | 88.59                               |
|                        | 6        | 48.49                            | 97.78                               |
|                        | 24       | 64.51                            | 100.00                              |
|                        | 48       | 73.37                            | 100.00                              |

\*Reaction condition: Catalyst 0.45 g, Levulinic acid 3 ml, Ethanol 1.75 ml, decane (internal standard) 0.1 ml, Toluene (Solvent) 15 ml, 373 K under an atmospheric pressure.
